# Supplementary material for: Secondary Structure of Influenza A Virus Genomic Segment 8 RNA Folded in a Cellular Environment
Source: Int J Mol Sci. 2022 Feb 23;23(5):2452. doi: 10.3390/ijms23052452 (PMC8910647; doi:10.3390/ijms23052452)
Supplement: Supplementary file 1 [file ijms-23-02452-s001.zip › Supplementary_Data/S1_Data.xlsx]

## Sheet: Title page
Supplementary Data
Secondary structure of influenza A virus genomic segment 8 RNA folded in a cellular environment
Barbara Szutkowska1, Klaudia Wieczorek1, Ryszard Kierzek1, Pawel Zmora1, Jake M. Peterson2, Walter N. Moss2, David H. Mathews3 and Elzbieta Kierzek1*
1 Institute of Bioorganic Chemistry, Polish Academy of Sciences, Noskowskiego 12/14, 61-704 Poznan, Poland
2 Roy J. Carver Department of Biochemistry, Biophysics and Molecular Biology, Iowa State University, Ames, IA 50011, United States of America
3 Department of Biochemistry & Biophysics and Center for RNA Biology, 601 Elmwood Avenue, Box 712, School of Medicine and Dentistry, University of Rochester, Rochester, NY 14642
* Corresponding author
E-mail: elzbieta.kierzek@ibch.poznan.pl (EK)

## Sheet: Primers
Table S1. List of primers used in study
Name	Sequence 5'-3'
Reverse transcription primers
1_8	*AGCAAAAGCAGGGTGACAAAAAC
2_8	*ACATGACCCTCGAGGAAATGTC
3_8	*CTTGAATGGAATGGTAACACGGTTC
*5' labelled with fluorophores 5-FAM, 6-TAMRA, 6-JOE or 5-ROX
PCR reaction primers
RC8	AGCAAAAGCAGGGTGACAAAAACATAATG
FC8	GCGTAATACGACTCACTATAGGGAGTAGAAACAAGGGTGTTTTTTATC
Real-time PCR primers
VTAG	GGCCGTCATGGTGGCGAAT
7VQR	AGTCAGAGGTGACAAGATTGGT
8VQR	TGT CAG AAA GGT AGC GCG AA
Reverse transcription primer used before real-time PCR reaction
8VRT	GGCCGTCATGGTGGCGAATAATCGTGGAATGGATCTTGA
7VRT	GGCCGTCATGGTGGCGAATAGCCGAGATCGCGCAGAGACT

## Sheet: vRNA8 reacitivites
Table S2.	vRNA8 nucleotide reactivites
vRNA8 A/California/04/2009 (H1N1)
Base	Position	1M7 reactivity	DMS reactivity
A	1	-999	-999
G	2	-999	-999
U	3	-999	-999
A	4	-999	-999
G	5	-999	-999
A	6	-999	-999
A	7	-999	-999
A	8	-999	-999
C	9	-999	-999
A	10	-999	-999
A	11	-999	-999
G	12	-999	-999
G	13	-999	-999
G	14	-999	-999
A	15	-999	-999
G	16	-999	-999
U	17	-999	-999
U	18	-999	-999
U	19	-999	-999
U	20	-999	-999
U	21	-999	-999
U	22	-999	-999
A	23	-999	-999
U	24	-999	-999
C	25	-999	-999
A	26	-999	-999
U	27	-999	-999
U	28	-999	-999
A	29	-999	-999
A	30	-999	-999
A	31	-999	-999
U	32	-999	-999
A	33	-999	-999
A	34	-999	-999
G	35	-999	-999
C	36	-999	-999
U	37	-999	-999
G	38	-999	-999
A	39	1.17986	-999
A	40	1.26342	1.14939
A	41	0.68083	0.451737
C	42	0.598097	0.048988
G	43	0.934846	-0.046276
A	44	0.077723	-0.118356
G	45	0.124805	0.0100648
A	46	0.966881	0.748091
A	47	0.874749	0.839842
A	48	0.745619	0.357247
G	49	0.134177	0.107692
C	50	0.115328	-0.0653248
U	51	-0.120446	-0.135072
C	52	0.408947	-0.246977
U	53	0.848843	-0.258527
U	54	0.330836	-0.306202
A	55	0.56168	0.572506
U	56	0.450639	0.0847176
C	57	0.141109	-0.0127405
U	58	0.00785516	0.0393255
C	59	0.138789	-0.0415652
U	60	0.187834	-0.0516616
U	61	0.121034	-0.13087
G	62	0.128422	-0.0398886
U	63	0.21026	0.0107791
U	64	0.00855856	-0.0675784
C	65	0.078411	-0.0916471
U	66	0.0728422	-0.159148
A	67	0.158993	0.437266
C	68	0.186754	0.0580525
U	69	0.0970647	0.0015003
U	70	0.180125	-0.0848846
C	71	0.347818	-0.17763
A	72	0.932323	1.09419
A	73	0.769185	0.605232
G	74	0.3462	0.0749546
C	75	-0.212479	-0.470344
A	76	0.345236	0.253992
G	77	0.275227	-0.065072
U	78	-0.29861	-0.436406
A	79	0.00129647	-0.0114958
G	80	-0.0838402	-0.0879799
U	81	0.229122	-0.327214
U	82	0.0516744	-0.108534
G	83	0.0971776	-0.28097
U	84	0.419824	-0.175117
A	85	1.17891	1.10651
A	86	0.535709	0.390418
G	87	0.260816	0.0871898
G	88	-0.00997285	-0.353067
C	89	0.0438047	-0.139457
U	90	0.219548	-0.106747
U	91	0.4164	-0.121674
G	92	0.27271	-0.324669
C	93	-0.0433059	-0.565715
A	94	0.608271	0.259035
U	95	-0.0805263	-0.0270942
A	96	0.187883	0.394679
A	97	0.409299	0.939537
A	98	1.0483	1.13916
U	99	0.382999	0.0430083
G	100	0.190518	-0.280173
U	101	0.563052	-0.296727
U	102	0.303849	-0.289297
A	103	0.108395	0.340211
U	104	0.206919	0.00221338
U	105	0.653499	-0.10213
U	106	0.330136	-0.19346
G	107	0.170751	-0.662962
U	108	0.468921	-0.391137
U	109	0.464103	-0.126598
C	110	0.697037	-0.185444
G	111	0.0714591	-0.0247658
A	112	0.727789	0.963159
A	113	0.889156	1.36897
A	114	0.437673	-0.0196229
C	115	0.120229	-0.718311
U	116	0.176499	-0.242491
A	117	0.282649	-0.837212
U	118	0.144368	-1.08019
U	119	0.0408301	-0.1342
C	120	-0.0764869	-0.153717
U	121	-0.233229	-0.346896
C	122	0.138635	-0.3802
U	123	0.0884773	-0.349247
G	124	0.0200697	-0.695002
U	125	0.0850602	-0.114681
C	126	0.134418	0.469623
G	127	-0.104753	-0.185243
C	128	-0.957254	-0.847905
U	129	-0.135453	-0.41017
U	130	0.118571	-0.14963
U	131	-0.0296331	-0.519179
C	132	0.0602329	-0.23946
A	133	0.721519	1.62266
A	134	0.61983	1.22694
U	135	0.171788	0.140275
C	136	0.223449	0.0533643
U	137	0.0980051	-0.159426
G	138	0.0572536	0.274328
U	139	0.0738848	-0.0766282
G	140	0.0570632	-0.108033
C	141	-0.135569	-0.243324
C	142	0.0725682	-0.45947
G	143	-0.372889	-0.967816
C	144	0.126551	-0.678343
A	145	-0.201587	-0.57507
U	146	0.397846	-0.202615
U	147	0.717202	-0.0015844
U	148	0.572031	-0.0848729
C	149	0.172551	-0.0269514
U	150	0.223367	0.00169152
U	151	0.68845	-0.254867
C	152	2.21219	0.120639
A	153	2.10668	1.78603
A	154	0.812778	0.630337
U	155	0.870304	0.117574
U	156	0.861433	0.168875
A	157	1.05233	1.53649
A	158	0.567669	0.700652
C	159	0.144252	0.139491
C	160	-0.0197797	0.000801503
A	161	0.151603	0.526808
C	162	-0.171294	-0.196841
C	163	-0.608074	-1.40214
U	164	-0.709102	-0.153264
U	165	0.426307	-0.197622
A	166	0.320489	-0.0319206
U	167	0.24534	-0.0316315
U	168	0.445097	-0.0125466
U	169	0.517775	0.0413869
C	170	0.182076	-0.115109
C	171	-0.148127	-0.673993
U	172	-0.460803	-0.406465
C	173	-0.349624	0.0406018
A	174	0.106223	0.436627
A	175	1.15709	1.73519
A	176	0.249068	0.484055
U	177	0.134717	-0.218194
U	178	0.547879	-0.0969522
U	179	0.33232	-0.087493
C	180	0.195231	-0.222647
U	181	0.115427	-0.334808
G	182	0.140892	-0.311137
U	183	0.0182629	0.0544761
C	184	-0.188259	-0.515381
C	185	-1.40019	-0.89128
C	186	-0.12156	0.0309549
A	187	0.128191	0.860553
A	188	1.33031	1.12036
U	189	0.0978753	0.0999299
U	190	0.34397	-0.122302
G	191	-1.13159	-0.875358
C	192	-0.655158	-0.549564
U	193	0.0569574	-0.0691999
C	194	-0.0134794	-0.00477333
U	195	0.305862	0.0111678
C	196	0.169168	-0.0440979
G	197	0.0317444	-0.149052
C	198	-0.273044	-0.293748
C	199	-0.28011	-0.637801
A	200	0.394159	-0.0173987
C	201	0.0871501	0.0801608
U	202	0.00594984	0.0775776
U	203	0.0488044	-0.0308823
U	204	0.781616	0.344539
U	205	0.499115	0.156308
C	206	0.507099	-0.336496
A	207	0.787031	-0.140018
U	208	0.372907	-0.0616483
U	209	0.609089	-0.0487166
U	210	0.471204	-0.0153984
C	211	0.256359	-0.0701567
U	212	0.446416	0.0131607
G	213	0.193572	-0.0316908
C	214	0.0351515	-0.0416241
U	215	0.0410941	-0.0727267
C	216	-0.018445	-0.0162148
U	217	0.6332	0.0539503
G	218	0.0285904	-0.00957434
G	219	0.110157	-0.00268238
A	220	0.0693845	0.151738
G	221	-0.0862165	-0.269721
G	222	-0.192602	-0.328024
U	223	-0.0388513	-0.483216
A	224	0.301642	-0.341904
G	225	0.362468	-0.614873
U	226	0.0990131	-0.271338
G	227	0.307634	-0.0199824
A	228	0.445642	0.990977
A	229	-999	1.40731
G	230	1.13404	-1.82481
G	231	1.3064	-1.42888
U	232	-1.22933	-0.57887
C	233	-0.653058	-0.098515
U	234	0.0891689	-0.150952
C	235	0.065958	-0.223411
C	236	0.0447008	-0.606261
C	237	-0.119724	-0.431437
A	238	-0.026829	0.76134
U	239	1.12055	0.149103
U	240	0.150447	-0.0268609
C	241	0.23235	-0.0912847
U	242	0.120708	-0.0648623
C	243	0.247434	-0.742199
A	244	-0.00074495	0.0982904
U	245	0.438307	-0.916293
C	246	0.688845	-0.286618
A	247	0.0366075	0.267187
C	248	0.172684	-1.65577
A	249	0.0191744	-1.38535
G	250	0.0227932	-1.46437
U	251	1.0979	0.00219283
U	252	1.45354	-0.0837065
U	253	0.358553	0.0637007
C	254	0.288019	-0.0795019
U	255	0.273846	-1.21149
C	256	0.377757	-0.465207
C	257	0.191254	0.97613
A	258	0.0208003	0.609319
A	259	-0.0730926	-0.0156975
G	260	0.0590002	-0.0753774
C	261	0.0219151	-0.0741207
G	262	0.146096	0.143319
A	263	0.218504	0.866409
A	264	0.0782476	0.781353
U	265	-0.0129844	0.182765
C	266	-0.054059	-0.0311093
U	267	-0.0691761	-0.0258931
C	268	-0.0867636	-0.0727797
U	269	-0.075501	-0.108622
G	270	0.00101235	-0.144853
U	271	0.115763	-0.157327
A	272	0.657254	1.25466
U	273	1.35175	-0.094797
A	274	0.406995	0.116518
U	275	0.222749	-0.082736
U	276	0.0803971	-0.386654
U	277	0.279047	-0.648179
U	278	0.363904	-0.155111
C	279	-0.0919446	-0.195474
A	280	0.0458472	-0.0482926
G	281	-0.117903	-0.0553374
A	282	-0.048468	-0.00210408
G	283	-0.0399188	-0.051279
A	284	-0.00416529	0.0959033
C	285	0.0307336	-0.0654403
U	286	-0.00305426	-0.169806
C	287	0.0622075	-0.139539
G	288	0.279764	0.0912634
A	289	0.520633	1.57951
A	290	0.337835	1.04144
C	291	-0.329648	-0.0480357
C	292	-0.0539132	-0.123642
G	293	-0.0749655	-0.39345
U	294	-0.151269	-0.280203
G	295	-0.215082	-0.491482
U	296	0.129483	-0.206752
U	297	0.258353	-0.119899
A	298	0.417174	0.866137
C	299	-0.108844	0.179242
C	300	-0.0867141	-0.182492
A	301	0.207891	0.0743218
U	302	0.26142	0.0334506
U	303	0.0143421	-0.0541326
C	304	6.19716e-06	-0.0977207
C	305	0.0353822	-0.336977
A	306	0.12287	0.23288
U	307	0.112064	0.0467584
U	308	0.0665074	-0.84261
C	309	0.0108129	1.01127
A	310	0.0655274	0.819995
A	311	0.31392	0.699313
G	312	0.467142	0.0538143
U	313	0.000581163	0.102001
C	314	0.020325	0.0227877
C	315	-0.00722056	-0.0107411
U	316	-0.0410159	-0.0445721
C	317	0.00932204	-0.273802
C	318	-0.0639276	-0.0725798
G	319	0.303903	-0.0990175
A	320	0.457731	-0.0867134
U	321	0.256653	0.0262628
G	322	0.113315	-0.109791
A	323	-0.116303	-0.135521
G	324	-1.00728	0.0130066
G	325	-0.316427	-0.116481
A	326	-0.101785	0.00139118
C	327	-0.0599795	-0.0585087
C	328	-0.05266	-0.577262
C	329	-0.6293	-0.0523408
C	330	-0.075956	1.26118
A	331	0.236186	1.02603
A	332	0.478416	0.344247
C	333	0.348475	-0.0300187
U	334	0.19303	0.0906876
G	335	-0.00810113	-0.574179
C	336	-0.169385	0.0742997
A	337	0.260862	0.0218103
U	338	-0.075343	-0.155038
U	339	-0.221643	-0.111319
U	340	-0.198102	-0.146323
U	341	0.247485	-0.21337
U	342	0.29531	-0.00351847
G	343	0.183986	0.165779
A	344	0.191991	-0.0841319
C	345	-0.069279	0.80189
A	346	0.329691	0.0845245
U	347	0.088034	-0.0366923
C	348	-0.0282408	-0.080875
C	349	-0.0585723	-0.341499
U	350	-0.0527301	-0.224072
C	351	0.048759	0.0358029
A	352	0.190936	-0.0706816
U	353	0.0232315	0
A	354	0.769922	1.61661
A	355	0.758758	0.433965
G	356	0.509054	-0.355919
U	357	0.0567919	-0.0410919
A	358	0.18712	-0.0740963
U	359	0.214855	-0.0377101
G	360	0.173799	-0.0688588
U	361	-0.0446051	-0.0942572
C	362	0.0437469	-0.0702327
C	363	-0.0405423	-0.108107
U	364	0.270975	-0.15452
G	365	-0.0731447	-0.160274
G	366	-0.0606192	0.0657635
A	367	0.189846	0.144729
A	368	0.150104	0.00858224
G	369	-0.295658	-0.0473028
A	370	-0.094851	-0.0859406
G	371	0.0486871	0.0451952
A	372	0.325889	0.209615
A	373	0.393366	0.00648196
G	374	-0.073021	-0.697068
G	375	-0.359172	-0.156321
U	376	0.0434006	-0.0213541
A	377	0.344739	0.782969
A	378	0.155706	0.353079
U	379	0.115064	-0.0634234
G	380	0.0419215	-0.241292
G	381	-0.374258	-0.318374
U	382	0.114136	-0.0588588
G	383	-0.331668	0.237651
A	384	0.0744202	1.36524
A	385	1.06555	0.197038
A	386	0.435858	-0.0272772
U	387	0.201334	-0.135177
U	388	0.237586	-0.170767
U	389	0.329333	-0.0810763
C	390	0.0561798	-0.10427
U	391	-0.0516887	-0.21824
C	392	-0.644816	-0.229215
C	393	-0.181994	1.24166
A	394	0.0942777	0.562619
A	395	0.0111236	-0.0458725
C	396	-0.427052	-0.379647
U	397	-0.258548	-0.00917938
A	398	-0.0974686	-0.248724
U	399	-0.0611208	-0.0885943
U	400	0.0433927	-0.263748
G	401	-1.15099	-0.151521
C	402	-7.28799	-1.2
U	403	-6.30656	-0.556538
C	404	-10.0502	-0.520863
C	405	-7.6971	-0.234003
C	406	-0.892183	-0.0757194
U	407	0.123386	-0.0216364
C	408	0.0243864	-0.081683
C	409	-0.0118981	-0.237364
U	410	-0.0808085	-0.264105
C	411	0.00454598	-0.0903674
A	412	0.618411	0.698049
G	413	0.35553	-0.0616869
U	414	-0.0325568	-0.107059
G	415	0.0797432	0.219422
A	416	0.571584	0.786819
A	417	0.591811	0.960623
A	418	0.759322	0.596321
G	419	0.0571536	0.0249851
C	420	-0.130735	-0.0630543
C	421	-0.120356	0.0070736
C	422	-0.0842192	-0.0250505
U	423	0.204302	-0.0571512
U	424	0.339947	-0.259318
A	425	0.810777	0.0595285
G	426	0.11452	-0.22339
U	427	-0.0416441	-0.58294
A	428	0.171041	0.0648783
G	429	0.334885	-0.205181
U	430	0.375401	-0.241161
A	431	1.10863	1.1167
U	432	0.401792	-0.217431
C	433	0.393153	0.0626301
A	434	0.810758	0.841827
A	435	0.568407	0.260748
G	436	-0.0272924	0.0404046
G	437	-0.0939717	-0.143558
U	438	0.000723082	-0.0385749
C	439	-0.164009	-0.00855094
U	440	-0.0856081	-0.0524096
C	441	-0.110661	-0.418212
U	442	0.500379	0.0861486
A	443	0.612374	1.25056
A	444	0.318052	0.240584
U	445	0.29199	-0.0117009
C	446	0.15919	-0.0780919
G	447	0.196241	-0.155911
G	448	0.355491	-0.148039
U	449	0.8008	-0.0735376
U	450	-0.000789489	0.114097
A	451	0.437813	1.33403
A	452	0.539261	0.683932
A	453	0.724015	0.355047
G	454	0.768886	0.0332984
A	455	0.381413	0.00971774
U	456	0.498624	-0.168742
U	457	0.535095	-0.275517
A	458	0.495633	0.0586318
C	459	-0.0122479	-0.219513
A	460	0.102165	1.2914
C	461	0.036718	0.108636
U	462	0.0763992	0.0364464
G	463	0.241519	0.0301652
A	464	0.546104	1.45735
A	465	1.08953	0.67599
G	466	0.667194	-0.0316608
U	467	0.930518	-0.0837082
U	468	0.732936	0.00274214
C	469	0.356629	-0.0574659
G	470	0.334029	-0.0344626
C	471	0.137925	-0.0330882
U	472	0.0355551	-0.0421293
U	473	0.00187461	-0.0417215
U	474	0.22934	-0.00272688
C	475	-0.208039	-0.0647193
A	476	0.324923	0.0877677
G	477	0.364613	0.110168
U	478	0.729391	0.0491869
A	479	1.18172	-0.0176335
C	480	0.91743	-0.0680082
U	481	0.530656	-0.280391
A	482	1.32288	0.783073
U	483	0.82671	-0.0446557
G	484	0.403862	-0.202524
U	485	0.744087	0.0293517
U	486	0.316832	-0.0880797
C	487	-0.00851763	-0.0897463
U	488	-0.0258522	-0.0832199
U	489	0.0297129	-0.093597
U	490	0.623013	0.00517863
U	491	0.290734	0.0732702
C	492	-0.216045	-0.10395
C	493	0.0348661	-0.385842
A	494	0.980038	1.527
U	495	0.688954	0.071455
G	496	0.26724	-0.00053124
A	497	0.739656	1.14722
U	498	0.403245	-0.0859104
C	499	-0.18989	-0.275557
G	500	-0.6942	-0.259733
C	501	-0.511446	-0.106345
C	502	-0.0988753	-0.0670427
U	503	-0.118539	-0.145568
G	504	-0.432918	-0.14859
G	505	-0.283855	-0.111239
U	506	-0.0665563	-0.0987506
C	507	-0.0641192	-0.106604
C	508	0.0534988	0.727411
A	509	0.930473	1.44596
A	510	0.611083	0.746665
U	511	0.948297	-999
C	512	0.464218	-999
G	513	0.0590183	0.0551527
C	514	-0.0850268	-0.0292833
A	515	-0.073605	-0.126125
C	516	0.126419	0.333787
G	517	-0.219577	0.037399
C	518	-0.203636	-0.316227
A	519	0.0741497	0.0612979
A	520	0.756036	0.441029
A	521	0.584764	0.915359
G	522	1.15942	0.0885699
A	523	-0.0804548	0.0475907
G	524	-0.197012	-0.0749173
G	525	-0.340313	-0.00914306
G	526	-0.1893	0.189335
C	527	-0.129637	-0.579967
C	528	-0.025424	0.204889
U	529	0.932409	0.0978335
A	530	1.52958	0.0299579
U	531	0.282555	0.0929037
U	532	-0.401103	0.254415
A	533	0.347127	0.0965619
U	534	1.32745	0.0159455
C	535	0.628423	0.827462
U	536	0.569037	0.467463
U	537	0.0072728	0.486539
U	538	0.153043	-0.160503
U	539	0.511004	-0.282238
G	540	0.409772	-0.539304
C	541	-0.261289	0.875253
C	542	-0.559939	0.650825
U	543	-1.61847	-0.20585
A	544	-0.153863	-0.57988
G	545	-0.329927	-0.068766
G	546	-1.87968	-0.723864
C	547	-1.40573	-0.693355
A	548	0.0860893	0.53101
U	549	0.468781	-0.111675
G	550	0.174478	-0.37415
A	551	0.069535	-0.234761
G	552	-0.789579	-0.314498
C	553	-2.40087	-0.402774
A	554	0.136402	-0.0138569
U	555	0.319461	-0.250292
G	556	0.605118	-0.0626922
A	557	0.767484	0.782668
A	558	0.427813	-0.200371
C	559	-0.374076	-0.117629
C	560	-3.97298	-0.773498
A	561	0.257155	0.184308
G	562	0.307573	0.174556
U	563	-0.238583	0.170717
C	564	-0.0642838	-0.344565
U	565	-0.254597	0.108067
C	566	0.110433	-0.376532
G	567	0.147916	-0.5366
U	568	0.0909862	0.126863
G	569	0.0867075	0.48436
A	570	-0.0957916	-0.108403
C	571	-0.339702	1.04409
A	572	0.199419	0.464247
U	573	0.310676	-0.265915
U	574	0.220362	-0.871008
U	575	0.0507223	0.153953
C	576	0.0175336	-0.125574
C	577	-0.0510416	-0.206984
U	578	-0.31408	0.0402326
C	579	-0.048125	-0.0912396
G	580	-0.0830062	0.0370591
A	581	-0.0178668	-0.628183
G	582	-0.458043	-0.490014
G	583	-0.311156	-0.0588182
G	584	-0.0678414	0.362612
U	585	-0.583433	-0.260598
C	586	-0.600914	0.806109
A	587	0.0513931	0.0288206
U	588	-0.0649003	0.0406389
G	589	-0.0537649	-0.133826
U	590	0.091747	-0.180469
C	591	-1.40657	-0.354976
A	592	0.440536	0.421339
G	593	0.11879	0.353042
A	594	0.833015	0.666741
A	595	0.635972	0.913468
A	596	0.673283	0.664198
G	597	0.436271	0.255855
G	598	0.0181586	-0.120502
U	599	-0.13968	0.168475
A	600	0.159732	0.45168
G	601	-0.051256	-999
C	602	-0.177357	0.998228
G	603	-0.282377	-0.131766
C	604	0.0295982	-0.157322
G	605	0.2112	-0.812498
A	606	0.424391	1.49555
A	607	0.635297	0.36519
G	608	0.0435256	-0.408505
U	609	-0.403272	-0.548005
A	610	0.802536	1.63307
G	611	-0.301506	-0.563025
G	612	-0.191971	0.0899576
U	613	-0.11053	-0.567978
A	614	0.056317	0.880255
C	615	-0.330836	-0.0338646
A	616	0.471038	0.802088
G	617	0.0114568	-0.0444219
A	618	0.0523855	0.133266
U	619	-0.189121	-0.221458
G	620	-4.94115	-0.0502575
C	621	-0.12327	0.770026
A	622	1.01425	0.806544
A	623	0.253531	0.197871
U	624	0.35339	-0.369311
U	625	0.436983	-0.0886239
G	626	0.195133	-0.545017
U	627	-0.894221	-0.230751
C	628	-1.91194	-0.306495
A	629	0.384004	-0.169546
U	630	0.537614	-0.0412357
U	631	0.210122	-0.232382
C	632	-0.708174	1.27599
U	633	-1.07862	-999
A	634	0.924177	1.26191
A	635	1.04648	0.618902
G	636	0.737427	-0.135417
U	637	-0.261049	-0.448457
G	638	0.181444	-0.587178
U	639	-0.214698	-0.670084
C	640	-0.248138	-0.69468
U	641	-0.0378935	-0.716852
C	642	-0.239265	0.481431
G	643	-0.182625	-0.297476
C	644	-0.293876	-0.818236
U	645	0.143244	0.415594
G	646	-0.164874	-0.383594
G	647	-0.60401	-0.49746
A	648	-0.0394236	-1.15867
U	649	0.246273	-0.0481995
U	650	0.250429	-0.404998
C	651	-0.28279	-0.460911
C	652	-0.311429	-0.349608
U	653	-0.192391	-0.344087
C	654	-0.330393	-0.426785
U	655	0.227891	-0.811333
U	656	-0.0313703	-0.481565
U	657	-0.723886	-0.412726
C	658	-0.766248	-0.0552099
A	659	0.840673	1.53995
A	660	0.867897	0.346044
G	661	-0.0325332	0.286007
A	662	0.601935	1.359
U	663	0.302255	-0.00495898
C	664	-1.1151	-0.255865
C	665	-1.49206	-0.261362
A	666	0.180927	-0.162366
U	667	0.752524	-0.13571
U	668	0.342366	-0.0911471
C	669	-0.447906	-0.246504
C	670	-2.15197	0.952818
A	671	-0.392848	-0.159899
C	672	0.00841377	-0.022945
G	673	0.919303	-999
A	674	0.238386	0.830569
U	675	0.496629	-0.0302326
U	676	0.917544	-0.288046
U	677	0.341125	-0.077002
G	678	-0.123614	-0.208395
U	679	0.0692455	-0.233223
U	680	0.64887	-0.166945
U	681	0.0394888	-0.096315
C	682	-0.259262	-0.0681824
C	683	-2.0608	-0.336955
C	684	-1.24343	-0.104922
A	685	0.39842	0.832145
A	686	-3.40582	-0.267572
C	687	-0.17185	0.103439
A	688	0.943659	0.975205
A	689	0.912009	0.429949
G	690	-0.178551	-0.120884
A	691	0.441732	0.815392
G	692	0.308634	-999
U	693	0.240727	-999
G	694	-0.0355955	-999
G	695	-0.268494	-999
C	696	-0.0689546	-0.127186
U	697	-0.0582473	-0.103932
G	698	-0.0890592	-0.153111
U	699	0.0601282	-0.211722
U	700	0.435015	-0.0782684
U	701	0.22488	-0.15134
C	702	0.288892	-0.148242
G	703	1.14969	-0.378403
A	704	0.53691	-2.00909
U	705	-2.2579	-0.727645
A	706	0.854503	-0.563911
U	707	0.108517	-0.366966
C	708	0.325201	0.000680878
G	709	0.132403	0.106599
A	710	0.093525	0.138503
G	711	-0.0959928	0.146499
G	712	-0.32944	-0.174644
C	713	-1.30366	-0.24116
C	714	-0.25645	-0.0750372
A	715	2.0728	1.0444
A	716	0.387956	0.91228
G	717	-0.0341208	0.00499698
G	718	-0.110751	0.252877
G	719	-0.306287	-0.256953
U	720	-0.204694	-0.0691224
G	721	-0.121767	-0.330042
U	722	-0.157098	-0.210206
U	723	-0.0610116	-0.0374432
G	724	0.0247324	-0.0320524
C	725	-0.123959	-0.0368065
C	726	-0.122124	-0.0511388
U	727	-0.121802	0.0706418
C	728	-0.0382515	-0.126364
U	729	0.0430686	-0.124829
U	730	-0.0402686	0.0594505
C	731	-0.276187	0.0576815
C	732	-0.185162	-0.167714
U	733	-0.465193	-1.63717
U	734	-2.46326	-3.03745
U	735	-2.61745	-1.64888
U	736	0.335861	-0.409314
A	737	1.38608	1.15984
A	738	0.410221	0.453866
G	739	0.259127	0.0355404
G	740	0.18899	0.0561134
A	741	0.522026	0.976654
C	742	0.0697812	0.432728
U	743	0.0779937	-0.410602
U	744	-0.126824	-0.419577
U	745	-0.143963	-0.326281
U	746	0.320771	-0.104496
G	747	0.569557	-0.11456
A	748	0.103825	-0.178353
U	749	1.42478	0.0446577
C	750	-0.0884249	0.911702
U	751	-0.0869106	-999
C	752	-0.64042	1.11938
G	753	-0.67614	-0.115984
G	754	-0.228839	-0.229442
C	755	0.0726327	-0.636229
G	756	1.854	-0.532559
G	757	1.16719	-0.186026
A	758	1.49978	-0.210686
G	759	0.0949802	-0.136938
C	760	-0.183051	0.988625
C	761	0.0462314	0.712162
G	762	0.167334	-0.101172
A	763	0.613058	0.0179986
U	764	-0.510492	-0.637641
C	765	-0.282079	-0.793797
A	766	0.108639	0.707376
A	767	-0.0349949	-0.768819
G	768	-0.197415	-0.69078
G	769	-0.00508838	0.0434279
A	770	0.142439	1.13002
A	771	0.218787	0.0463646
U	772	0.0387615	-0.0195838
G	773	0.0111519	0.265038
G	774	-0.135174	-0.340677
G	775	-0.201911	-0.283576
G	776	-0.132036	-0.419054
C	777	-0.373884	-0.347322
A	778	-0.143237	0.43604
U	779	-0.0355239	-0.0819199
C	780	-0.264672	0.135619
A	781	-0.0338395	0.134572
C	782	-0.0448548	-0.068102
C	783	-0.165956	-0.213462
C	784	0.210599	-0.374863
A	785	1.51953	0.81586
A	786	2.22052	0.790571
U	787	0.635339	-0.173972
C	788	-0.767952	-0.560588
C	789	-2.96136	-1.06239
A	790	0.105305	-0.642603
U	791	0.803756	-0.405685
U	792	0.236777	-0.13824
G	793	-0.0471295	-0.149414
U	794	-0.180408	-0.185137
C	795	-0.325902	-0.193928
U	796	-0.336321	-0.75786
G	797	-0.321242	-0.529564
C	798	-0.305743	0.140953
A	799	-0.223639	0.618171
A	800	0.055726	0.88893
A	801	0.517704	1.08624
U	802	4.45144	-0.0298927
C	803	1.3601	-0.317736
G	804	0.463797	-0.333649
C	805	0.625492	-0.047165
U	806	0.633982	-0.148464
U	807	0.225399	-0.140153
G	808	0.0587387	-0.0539386
C	809	-0.182441	-0.365042
G	810	-0.216748	0.0683672
G	811	-0.0210348	-0.362787
A	812	0.0278587	-0.202394
U	813	0.0209661	-0.0933026
A	814	-0.842979	-0.642863
U	815	0.494535	-0.107805
G	816	1.96109	0.103547
C	817	0.64895	-0.592936
C	818	-999	-1.18322
A	819	-999	-0.722908
A	820	-999	0.345472
A	821	-999	0.64583
G	822	-999	-0.15121
G	823	-999	0.154888
A	824	-999	0.256117
A	825	-999	0.802636
A	826	-999	0.404092
C	827	-999	-0.0808788
A	828	-999	-999
G	829	-999	-999
U	830	-999	-999
C	831	-999	-999
U	832	-999	-999
A	833	-999	-999
C	834	-999	-999
C	835	-999	-999
U	836	-999	-999
G	837	-999	-999
A	838	-999	-999
A	839	-999	-999
A	840	-999	-999
G	841	-999	-999
C	842	-999	-999
U	843	-999	-999
U	844	-999	-999
G	845	-999	-999
A	846	-999	-999
C	847	-999	-999
A	848	-999	-999
U	849	-999	-999
G	850	-999	-999
G	851	-999	-999
U	852	-999	-999
G	853	-999	-999
U	854	-999	-999
U	855	-999	-999
G	856	-999	-999
G	857	-999	-999
A	858	-999	-999
G	859	-999	-999
U	860	-999	-999
C	861	-999	-999
C	862	-999	-999
A	863	-999	-999
U	864	-999	-999
U	865	-999	-999
A	866	-999	-999
U	867	-999	-999
G	868	-999	-999
U	869	-999	-999
U	870	-999	-999
U	871	-999	-999
U	872	-999	-999
U	873	-999	-999
G	874	-999	-999
U	875	-999	-999
C	876	-999	-999
A	877	-999	-999
C	878	-999	-999
C	879	-999	-999
C	880	-999	-999
U	881	-999	-999
G	882	-999	-999
C	883	-999	-999
U	884	-999	-999
U	885	-999	-999
U	886	-999	-999
U	887	-999	-999
G	888	-999	-999
C	889	-999	-999
U	890	-999	-999

## Sheet: Global vRNA8 base pair counts 
Table S3. Base-pairing conservation (BP) calculation across type A influenza in vRNA8 global structure
i	j	GC	CG	AU	UA	GU	UG	GA	AG	AA	GG	UU	CC	AC	UC	CA	CU	Total Pairs	BP Types	% Canonical
1	890	1	1	3803	0	4	2	0	2	6	0	5	0	10	2	0	2	3838	5	99.2965
2	889	3958	0	1	0	9	0	1	0	1	15	0	2	6	5	0	1	3999	3	99.2248			Avg. % Canonical BP	86.375
3	888	1	6	3	1	1	4095	0	3	0	12	13	2	3	14	0	0	4154	6	98.8686				% total
4	887	0	0	3476	0	3	0	1	15	6	3	4	0	578	1	0	6	4093	2	84.9988			GC pairs	34.6504
5	886	11	0	22	0	4353	0	2	1	0	2	3	0	1	1	0	1	4397	3	99.7498			AU pairs	35.6531
6	885	0	0	4480	0	8	0	1	1	2	0	2	0	11	0	0	1	4506	2	99.6005			GU pairs	15.5713
7	884	0	0	4584	1	15	0	0	0	3	0	5	0	16	0	0	1	4625	3	99.4595			CA	6.16531
9	882	0	5054	1	0	0	3	0	27	0	5	0	11	12	1	0	19	5133	3	98.5389			GA	1.57851
11	881	0	1	5190	0	6	0	1	34	5	1	2	0	10	1	0	8	5259	3	98.8211			CU	2.28206
12	880	5311	0	1	0	27	0	4	2	0	16	0	5	32	4	0	0	5402	3	98.8338			AA	0.787191
13	879	5521	0	0	1	3	0	3	1	0	4	0	4	9	4	0	0	5550	3	99.5495			GG	2.09334
14	878	15244	0	0	2	3	0	4	0	0	0	0	3	2	15	0	0	15273	3	99.8429			CC	0.5627
15	877	1	0	1	15294	0	16	111	0	4	0	13	0	1	42	2	0	15485	4	98.8828			UU	2.22403
30	64	0	0	34076	0	133	0	0	3	1	0	13	0	10	0	0	12	34248	2	99.8861
31	63	1	0	16074	0	0	0	0	1	2	0	3	2	18154	8	0	0	34245	2	46.9412
32	62	0	0	1	0	0	31313	0	11	0	1	2910	0	0	12	0	0	34248	2	91.4331
33	61	22	0	30999	0	366	0	0	4	17	0	10	2	2821	1	0	2	34244	3	91.6569
34	60	0	0	23429	0	4	0	0	36	2878	0	4	0	7880	0	0	9	34240	2	68.4375
35	59	33642	0	0	0	2	0	0	0	0	1	0	1	596	2	0	0	34244	2	98.2479
38	57	33876	0	0	0	338	0	17	0	0	1	1	4	2	7	0	0	34246	2	99.9066
39	56	1	0	34161	0	61	0	0	18	1	0	4	0	0	0	0	0	34246	3	99.9328
43	52	34222	0	0	0	15	0	0	0	0	3	0	1	6	1	0	0	34248	2	99.9679
44	51	2	0	28504	0	3	0	0	0	1	0	6	1	5720	1	0	4	34242	3	83.2574
45	50	7471	0	3203	0	23530	0	8	0	2	9	8	0	5	4	0	2	34242	3	99.889
65	80	0	33988	0	0	0	8	0	0	0	5	0	5	0	0	210	29	34245	2	99.2729
66	79	0	1	0	10382	0	0	40	0	2921	0	0	0	0	0	20896	1	34241	2	30.3233
67	78	1	2	27398	0	6	0	0	2819	91	0	4	0	3924	0	0	0	34245	4	80.0321
68	77	0	23016	0	3	0	3	1	2	0	0	0	3	0	0	11214	0	34242	3	67.2332
69	76	0	0	0	33254	0	6	7	0	6	0	1	0	0	4	969	0	34247	2	97.118
87	876	9944	0	1	15	3	0	27	0	0	11	3	13	299	6419	0	0	16735	4	59.5339
88	875	522	0	0	0	18528	0	28	0	0	6	0	0	0	0	0	0	19084	2	99.8218
89	874	0	19081	0	0	0	1	0	2	0	0	0	23	0	0	48	41	19196	2	99.4061
92	869	7	0	0	0	21179	0	1	0	0	4	2	0	0	0	0	4	21197	2	99.9481
93	868	0	21028	0	0	0	244	0	58	0	3	0	2	0	0	1	11	21347	2	99.6487
94	867	0	0	21747	0	1	0	0	9	6	0	0	0	2	0	0	0	21765	2	99.9219
95	866	0	0	0	19444	0	30	57	6	2398	1	7	0	0	0	22	0	21965	2	88.6592
96	865	12	0	13445	0	8524	0	30	14	7	5	1	0	54	0	0	1	22093	3	99.4931
97	864	0	0	34235	0	0	0	0	0	0	0	10	0	0	0	0	2	34247	1	99.965
99	863	0	0	0	25066	0	0	308	0	1875	0	0	0	0	0	6994	0	34243	1	73.2004
100	862	34244	0	0	0	0	0	0	0	0	0	0	3	0	1	0	0	34248	1	99.9883
108	858	0	289	0	27233	0	350	3	1	4	0	6	3	0	1	6327	7	34224	3	81.4399
109	857	0	2	0	97	0	34104	0	5	0	1	33	0	0	4	0	0	34246	3	99.8744
110	856	0	32183	0	0	0	3	0	0	0	4	0	17	0	2	591	1437	34237	2	94.0094
111	855	1	0	17476	0	15862	0	1	865	4	30	1	0	1	0	0	0	34241	3	97.3657
112	854	0	0	34182	0	3	0	0	15	12	0	18	0	18	0	0	0	34248	2	99.816
114	852	1	0	17024	0	17203	0	3	5	0	5	0	0	2	0	0	1	34244	3	99.9533
115	851	0	34231	0	0	0	0	0	0	0	3	0	3	0	0	6	3	34246	1	99.9562
116	850	1	3	0	25158	0	5918	1	0	0	0	262	1	0	2883	13	0	34240	4	90.771
117	849	6518	0	6300	0	2684	0	23	1	64	3	1	2	18645	0	0	0	34241	3	45.2732
123	848	0	0	3	22226	0	47	64	43	10722	0	1	0	4	7	1108	0	34225	3	65.0869
124	847	30877	0	1	0	3325	0	34	0	0	3	0	0	6	1	0	0	34247	3	99.8715
125	846	0	0	3	31285	0	10	2	0	2	0	2912	0	0	11	22	0	34247	3	91.389
126	845	0	9451	1	26	0	12694	36	9388	262	2365	1	0	0	1	13	1	34239	4	64.7566
127	842	17388	44	5	0	1	2826	3	23	0	3	0	36	13406	508	0	0	34243	5	59.1771
128	841	6	8117	0	8625	0	13955	0	130	0	4	34	4	0	2833	537	0	34245	4	89.6569
129	840	0	4	0	21669	0	4	2030	0	109	2	0	1	0	0	10410	0	34229	3	63.3293
130	839	0	1	0	24977	0	1	2891	0	20	0	9	0	0	0	6344	0	34243	3	72.9463
131	838	0	7	0	23752	0	10436	5	0	1	0	1	0	0	0	40	0	34242	3	99.8627
132	837	0	18304	0	0	0	15895	0	24	0	4	2	3	0	0	1	9	34242	2	99.8744
133	836	0	0	34237	0	1	0	0	0	2	0	0	0	5	0	0	3	34248	2	99.9708
136	829	0	19995	1	1267	0	776	5	84	2828	2	0	6	1	0	9252	14	34231	4	64.3832
137	828	0	0	0	34124	0	3	28	0	1	0	2	0	0	10	74	0	34242	2	99.6642
138	827	20681	0	2	0	0	0	1	4	2	2	0	23	13416	109	0	0	34240	2	60.406
139	826	0	127	0	10564	0	23479	3	25	1	9	0	0	0	1	26	0	34235	3	99.8101
143	192	7325	0	0	38	13767	700	9	0	0	21	12244	0	0	135	0	1	34240	4	63.7558
144	191	2541	21475	1	0	1	9755	0	63	0	14	3	6	355	2	0	23	34239	5	98.639
145	190	0	0	31307	0	21	0	0	0	3	0	0	20	8	0	0	2887	34246	2	91.4793
197	696	30913	0	0	14	12	1	69	0	0	1	0	2	0	3227	0	0	34239	4	90.3648
198	695	0	34234	0	0	0	0	0	2	0	1	0	4	0	0	3	1	34245	1	99.9679
199	694	0	25197	0	0	0	0	1	0	2	0	0	19	0	0	7782	1217	34218	1	73.6367
200	693	0	0	34223	0	0	0	0	2	3	0	0	0	12	0	0	4	34244	1	99.9387
201	692	0	9008	0	16	0	24196	0	47	0	966	3	0	0	0	0	0	34236	3	97.0324
202	691	38	30	9	21026	2792	8979	74	0	0	20	288	3	0	618	343	0	34220	6	96.0666
203	690	0	54	4	1985	1	29135	1	0	0	13	2995	0	0	6	1	44	34239	5	91.0628
211	611	0	33070	0	1	0	112	0	2	0	1	2	2	0	0	1032	22	34244	3	96.9016
212	610	2	0	1	26248	13	633	12	0	0	5	2993	0	0	4334	0	0	34241	5	78.552
213	609	20739	0	134	0	10594	0	228	0	268	1	32	4	2227	7	0	0	34234	3	91.9174
214	608	0	17480	10	49	0	13975	44	2066	97	290	19	5	0	4	131	60	34230	4	92.0654
215	607	2	7	0	31195	3	1250	1101	1	4	4	366	2	1	192	116	0	34244	5	94.7816
216	260	0	9645	0	14	0	24473	1	6	0	94	3	1	0	0	2	5	34244	3	99.6729
217	259	0	0	0	34225	0	1	7	0	4	0	1	0	0	0	8	0	34246	2	99.9416
218	257	34239	0	0	0	1	0	0	0	0	0	0	2	1	3	0	0	34246	2	99.9825
219	256	31303	0	0	0	6	0	2	0	0	1	0	59	1239	1612	0	1	34223	2	91.4853
220	255	5	0	30283	0	2	0	1	16	2	0	4	0	3929	0	0	1	34243	3	88.456
221	254	33788	0	0	0	130	0	0	0	0	0	0	1	310	14	0	0	34243	2	99.0509
222	253	16	0	2526	1	22162	0	0	0	0	2	9313	0	4	5	0	206	34235	4	72.163
225	248	30630	1	17	0	255	0	454	336	306	13	0	0	2219	1	0	0	34232	4	90.2752
226	247	0	0	0	32288	0	1931	0	2	3	0	7	0	0	0	7	0	34238	2	99.9445
227	246	13358	0	132	0	20101	0	32	1	0	557	0	0	54	2	0	0	34237	3	98.1132
228	245	76	0	9700	0	24375	0	1	1	1	1	87	0	1	0	0	3	34246	3	99.7226
229	242	0	0	34232	0	2	1	0	4	1	0	4	0	1	0	0	2	34247	3	99.965
230	241	31942	0	0	0	15	0	0	0	0	0	5	0	2218	64	0	0	34244	2	93.3215
231	240	13854	0	504	0	19111	0	0	0	0	1	5	4	704	40	0	1	34224	3	97.7939
261	288	1	32747	1	0	0	687	0	90	0	2	5	4	0	0	1	706	34244	4	97.6405
262	287	33330	0	2	0	483	0	0	0	0	1	0	0	419	0	0	0	34235	3	98.7732
263	286	0	0	32997	0	2	0	0	3	2	0	63	1	1055	118	0	1	34242	2	96.37
265	284	0	3	0	28623	0	2904	1	1	5	0	6	2	0	2696	6	0	34247	3	92.0665
266	283	0	31252	0	0	0	30	0	1	0	1	0	2894	0	6	16	41	34241	2	91.3583
267	282	0	0	0	33816	0	27	0	0	0	0	391	0	0	0	11	0	34245	2	98.8261
268	281	0	34186	0	0	0	39	0	7	0	0	0	0	0	0	9	1	34242	2	99.9504
269	280	0	0	0	34241	0	3	0	0	0	0	0	0	0	0	3	0	34247	2	99.9912
270	279	26071	0	0	0	8166	0	0	0	0	10	0	0	0	0	0	0	34247	2	99.9708
292	605	0	9173	0	85	0	24915	0	49	0	1	12	0	0	0	6	0	34241	3	99.8014
293	604	17731	0	2	0	13223	1	2913	0	0	317	34	1	1	14	0	0	34237	4	90.4197
294	603	0	197	5	229	0	30822	0	2896	0	7	82	0	0	3	0	2	34243	4	91.2683
295	602	33512	0	5	0	285	0	15	0	3	0	0	0	420	0	0	0	34240	3	98.7208
296	601	0	3	0	3767	0	18094	1	0	0	1	8713	0	0	3655	3	0	34237	3	63.8607
298	599	0	0	34217	0	23	0	0	1	0	0	0	0	4	0	0	0	34245	2	99.9854
299	598	0	8781	0	3627	0	21490	0	5	0	4	0	0	0	0	326	0	34233	3	99.0214
300	597	0	18429	3	12	0	176	0	13	0	0	48	191	0	2	755	14607	34236	4	54.3872
302	595	0	0	0	7775	0	1041	0	0	0	0	24625	1	0	762	4	30	34238	2	25.7492
303	594	0	0	1	5861	0	8	0	0	0	0	25141	0	0	3227	2	1	34241	3	17.1432
304	593	1	33775	0	0	0	0	0	6	0	0	0	348	0	0	89	22	34241	2	98.642
305	335	0	34245	0	0	0	2	0	0	0	0	0	1	0	0	0	0	34248	2	99.9971
306	334	0	0	33857	0	2	0	0	1	1	0	2	0	373	0	0	4	34240	2	98.8873
307	332	0	0	0	31132	0	4	2	0	1	0	5	0	0	0	3101	0	34245	2	90.9213
308	331	0	0	0	34228	0	3	9	0	1	0	0	0	0	2	4	0	34247	2	99.9533
312	327	27530	0	889	0	4107	0	54	3	0	4	0	0	1618	17	0	0	34222	3	95.0441
313	326	0	37	0	32525	0	101	125	0	2	1	10	1	0	3	1434	0	34239	3	95.3971
314	325	0	34086	0	0	0	21	0	0	0	0	0	1	0	0	34	103	34245	2	99.597
315	324	0	34217	0	0	0	5	0	0	0	0	0	1	0	0	9	13	34245	2	99.9328
316	323	0	0	0	29666	0	2	43	0	3012	0	1	0	0	0	1521	0	34245	2	86.6345
317	322	0	33586	0	0	0	644	0	0	0	0	0	0	0	0	16	0	34246	2	99.9533
337	357	0	0	31305	0	2	0	0	2	2922	0	1	0	14	0	0	1	34247	2	91.4153
338	356	0	23	1	21	0	33698	0	169	0	88	239	0	0	6	0	0	34245	4	98.5341
339	355	0	0	0	34084	0	1	7	0	1	0	1	0	0	2	151	0	34247	2	99.527
340	354	1	0	1	5867	0	87	0	0	0	0	16144	38	0	12046	25	30	34239	4	17.3954
342	352	1	5	0	28360	0	2587	50	0	0	0	3114	0	0	109	20	1	34247	4	90.3816
343	351	32482	0	1	0	1746	0	0	0	0	5	0	1	2	2	0	0	34239	3	99.9708
344	350	0	0	34237	0	3	0	0	3	0	0	1	0	3	0	0	0	34247	2	99.9796
360	498	5599	0	17	0	28615	0	1	0	0	0	3	0	1	0	0	1	34237	3	99.9825
361	497	0	2	0	33675	0	457	6	0	1	1	0	0	0	0	97	0	34239	3	99.6933
362	496	0	18490	0	1	0	6	0	0	0	0	9	250	0	0	5516	9966	34238	3	54.0248
364	494	0	0	0	34033	0	191	5	0	2	0	1	0	0	10	0	0	34242	2	99.9474
365	493	32452	0	0	0	527	0	1198	0	4	19	0	0	41	0	0	0	34241	2	96.3144
366	492	33798	0	2	0	379	0	0	0	0	1	2	3	45	6	0	1	34237	3	99.8306
367	491	0	0	31078	0	36	0	0	6	2	0	55	6	208	0	0	2847	34238	2	90.8756
368	490	0	0	6897	0	0	0	6	4745	14887	2	0	0	7693	0	0	0	34230	1	20.149
369	489	13	0	9109	0	22172	1	0	0	0	0	2925	0	2	1	0	12	34235	4	91.4123
370	488	6	0	32224	0	1952	0	0	2	0	0	4	0	54	0	0	0	34242	3	99.8248
371	487	17691	0	37	1	16222	0	2	0	0	11	201	0	36	36	0	1	34238	4	99.1618
372	486	0	0	33281	0	5	0	0	16	7	0	0	0	931	0	0	0	34240	2	97.2138
374	403	1506	0	195	0	29671	0	1120	1	4	1665	75	0	1	1	0	1	34240	3	91.6238
375	402	33331	0	2	0	533	0	225	0	46	1	0	1	85	17	1	0	34242	3	98.9019
376	401	0	14602	2	91	0	16521	0	2924	11	31	19	2	0	1	32	1	34237	4	91.1762
377	400	0	0	30785	0	32	0	0	2333	925	0	0	0	171	0	0	0	34246	2	89.9872
378	399	9	0	29819	0	1086	0	1	3	2	0	2894	0	362	3	0	65	34244	3	90.2757
379	398	0	0	0	28661	0	12	2765	0	249	0	0	0	0	0	2554	0	34241	2	83.7388
380	397	3	0	14	37	7429	33	20662	0	10	5878	157	0	0	0	0	0	34223	5	21.9618
381	396	33985	0	1	0	217	0	4	0	0	0	0	1	24	10	0	0	34242	3	99.8861
382	395	0	0	0	31275	1	45	19	0	2899	0	2	0	0	1	3	0	34245	3	91.4615
383	392	31190	3	0	0	1	132	0	2	0	2775	0	0	139	3	0	0	34245	4	91.4761
384	391	0	0	14299	2	1	4	0	15710	3956	0	12	0	254	1	0	0	34239	4	41.7828
414	476	0	0	0	34218	0	2	4	0	9	0	0	0	0	1	8	0	34242	2	99.9358
415	475	23412	0	333	0	5169	0	937	26	22	2184	0	0	2141	7	0	0	34231	3	84.4673
416	474	1	0	31804	0	4	0	0	1	0	0	5	0	2427	0	0	0	34242	3	92.8947
418	472	87	0	29291	0	659	0	0	1	1	0	835	5	3244	21	0	94	34238	3	87.73
419	471	34224	0	0	0	0	0	6	0	0	0	0	7	1	2	0	0	34240	1	99.9533
420	470	0	34229	0	0	0	3	0	2	0	1	0	5	0	0	1	0	34241	2	99.9737
422	466	0	18917	0	10	0	18	2	0	0	1	0	3	0	0	15269	3	34223	3	55.3575
423	464	0	0	0	34202	0	5	31	0	0	0	0	0	0	0	2	0	34240	2	99.9036
424	463	0	3739	2	142	1	17905	108	7038	400	4775	1	0	0	0	126	0	34237	5	63.6417
425	462	0	0	31317	0	3	0	0	4	2906	0	1	0	9	0	0	1	34241	2	91.4693
426	461	25143	4	28	0	5351	0	1	46	0	2858	7	3	758	35	0	0	34234	4	89.1687
427	460	5	32	551	30200	73	171	585	3	132	8	2	2	102	3	2369	0	34238	6	90.6361
429	459	21455	0	63	0	76	0	22	0	3	3	0	3	12602	10	0	0	34237	3	63.0721
430	458	0	1	0	30734	0	54	2967	0	162	3	6	0	0	0	312	0	34239	3	89.9238
436	457	13589	46	839	309	6084	2363	71	3	64	17	396	35	6169	4091	139	10	34225	6	67.8744
437	456	617	0	22	0	29423	1	164	0	0	2786	1194	0	0	11	3	17	34238	4	87.8059
438	455	0	8	0	31570	0	427	2	0	52	0	14	0	0	13	2147	0	34233	3	93.4917
439	454	1	12879	2	6373	0	797	316	11	25	1	2071	106	1	85	10604	954	34226	5	58.587
440	453	0	0	0	34143	0	68	3	0	1	0	2	0	0	3	20	0	34240	2	99.9153
442	451	0	4635	0	16084	0	3467	5	665	102	3	0	3	0	1	9242	5	34212	3	70.6945
443	450	2	0	12149	0	1	0	0	5	3	0	0	1	22073	0	0	1	34235	3	35.4958
500	547	31971	0	0	1	596	0	1587	0	0	20	0	3	33	2	0	0	34213	3	95.1919
501	546	0	34156	0	0	0	43	0	34	0	0	0	2	0	0	4	0	34239	2	99.8832
502	545	0	30460	0	0	0	3743	0	24	0	1	0	0	0	0	2	3	34233	2	99.9124
503	544	0	5	0	9976	1	21241	0	1	0	1	2930	0	0	78	4	1	34238	4	91.194
504	543	8	0	0	0	34222	0	0	0	0	6	4	0	0	0	0	0	34240	2	99.9708
505	542	9457	0	905	0	21342	0	32	0	4	187	3	0	2298	1	0	2	34231	3	92.6178
517	541	18505	0	1325	0	3849	0	24	0	22	8	4	2581	7597	99	0	210	34224	3	69.1883
518	540	0	30953	0	0	0	152	0	2991	0	1	0	1	1	22	86	29	34236	2	90.8547
519	539	81	0	30957	0	183	0	1	0	14	0	2941	0	42	0	0	19	34238	3	91.1882
522	538	19050	0	173	0	14802	0	21	0	0	27	11	0	138	6	0	0	34228	3	99.4069
523	537	6	0	20419	0	13546	0	0	17	0	0	216	0	12	0	0	19	34235	3	99.2289
524	536	73	0	17	0	31227	0	3	0	0	8	21	4	0	0	0	2887	34240	3	91.4632
525	535	8716	1	11739	0	9868	0	2	1	1	1	14	328	935	183	0	2450	34239	4	88.5657
526	534	5189	0	547	42	8891	2	6	3	159	4	1095	1515	6436	7705	207	2413	34214	5	42.8801
549	592	0	5	0	32389	2	1541	15	0	28	0	182	0	0	16	64	0	34242	4	99.1093
550	591	21589	0	1	0	8	0	0	0	0	0	1	832	3248	8564	0	0	34243	3	63.0727
551	590	0	0	34205	0	2	0	0	0	1	0	0	0	34	0	0	0	34242	2	99.8978
553	589	0	29674	0	0	1	48	0	10	0	2	0	4	0	0	3780	718	34237	3	86.8154
554	588	0	0	34199	0	10	0	0	18	8	0	0	0	0	0	0	9	34244	2	99.8978
555	587	0	0	0	34188	0	2	40	0	7	0	0	0	0	0	7	0	34244	2	99.8423
556	586	31003	0	0	0	178	0	2	0	0	0	1	77	905	2073	0	0	34239	2	91.0687
558	585	0	0	33920	0	88	0	0	3	119	0	7	0	32	0	0	74	34243	2	99.3137
559	584	0	31255	0	0	0	0	0	8	0	3	0	2903	1	0	6	66	34242	1	91.2768
560	583	0	12073	0	0	0	2	0	8	5	0	0	8	0	0	22043	103	34242	2	35.2637
564	582	0	21892	0	0	2	123	0	3	0	14	7623	779	0	43	22	3739	34240	3	64.302
565	581	0	166	0	24178	0	340	2	0	3	0	5	1	0	3	9535	0	34233	3	72.1059
566	580	0	10973	0	60	0	43	0	1	2	0	142	102	0	3	19912	2996	34234	3	32.3538
567	579	9608	0	0	0	16	0	1	0	0	0	10	8	0	24599	0	1	34243	2	28.105
569	576	31335	0	0	0	22	0	0	0	0	0	0	2875	5	6	0	1	34244	2	91.5693
570	575	0	0	31137	0	11	0	0	0	0	0	3078	0	2	1	0	13	34242	2	90.9643
612	644	8639	0	97	0	25398	0	48	0	0	10	30	0	17	1	0	0	34240	3	99.6904
613	643	0	3040	0	10514	0	9726	1967	39	1490	132	40	93	0	4	4883	30	31958	3	72.8456
616	641	12	0	15519	3	6946	2	0	2	5	2	9326	0	67	30	0	67	31981	5	70.298
617	640	24893	0	3	0	5914	0	1106	0	0	41	3	2	4	14	0	0	31980	3	96.3415
618	639	13	0	12192	0	15	0	3	20	157	0	3	2	19574	10	0	0	31989	3	38.2006
619	638	4	79	635	100	211	8651	3	6329	11	13865	2073	0	6	12	0	12	31991	6	30.2585
620	637	255	0	6796	0	21957	2	2029	16	3	913	11	0	10	0	1	1	31994	4	90.6733
621	636	0	29454	0	2	0	62	3	5	0	18	0	2	0	0	2374	64	31984	3	92.2899
645	666	0	8995	17	8963	0	94	1	13	2	1	376	2849	0	41	139	12745	34236	4	52.7778
646	665	15731	0	8296	1	121	0	16	0	1	3	1218	39	4632	2506	0	1668	34232	4	70.5451
647	664	28951	0	7	552	1705	41	173	29	0	2611	29	3	55	16	36	6	34214	5	91.3544
648	663	5	0	30370	0	864	1	0	4	2	0	2886	0	84	10	0	13	34239	4	91.241
649	662	0	11	0	29042	0	8	49	0	9	0	0	0	0	0	5117	0	34236	3	84.8843
650	661	0	7	0	27692	0	5922	1	1	1	0	63	0	0	207	341	0	34235	3	98.2065
677	688	1	175	3	28858	0	1393	0	108	298	1	349	68	0	2869	107	2	34232	5	88.8934
678	687	30665	0	0	4	341	0	178	0	0	2	6	3	6	3031	0	0	34236	3	90.5772
679	686	0	9682	1	8629	1	1969	1	2	2	3	2883	6	0	14	8903	2143	34239	5	59.2365
680	685	0	2	1	22582	1	286	1	0	2	0	5840	325	3	5121	48	25	34237	5	66.8049
698	713	30977	0	4	0	235	0	5	0	0	2	0	15	2930	71	0	0	34239	3	91.1709
699	712	5	254	0	13793	0	8570	479	9	2249	54	23	689	5	11	5884	2218	34243	4	66.0631
700	711	0	2404	0	352	0	30905	0	64	0	42	124	3	0	3	7	338	34242	3	98.3033
701	710	0	0	0	29179	0	5	2	0	8	0	5	0	0	0	5038	1	34238	2	85.2386
702	709	13	6064	0	82	7	3267	1	0	0	2170	7825	11807	0	2092	305	604	34237	5	27.5521
703	708	28355	0	40	1	1621	0	5	0	0	2	25	2203	1201	770	2	11	34236	4	87.6767
717	784	31535	0	0	2	1958	0	654	0	0	3	3	0	6	76	0	0	34237	3	97.8328
718	783	8994	0	7670	2876	49	0	0	0	12	0	17	4	14551	68	1	0	34242	4	57.2075
719	782	34147	0	0	0	37	0	8	0	0	3	0	3	3	39	0	0	34240	2	99.8364
720	781	0	2	0	32572	0	1524	1	0	8	0	38	0	0	41	55	0	34241	3	99.5824
721	780	27494	0	0	0	0	0	0	0	0	0	0	8	6713	27	0	0	34242	1	80.2932
723	778	0	0	0	34039	0	107	4	0	63	0	0	0	0	1	28	0	34242	2	99.7196
724	777	33227	0	0	0	360	0	9	0	0	1	3	5	500	136	0	0	34241	2	98.09
725	776	0	34197	0	0	0	3	0	0	0	3	0	1	0	0	28	11	34243	2	99.8744
726	775	0	28723	0	367	0	2206	0	10	20	0	6	1	0	1	2879	25	34238	3	91.4072
727	774	0	1278	0	0	0	32959	0	1	0	1	1	0	0	0	0	0	34240	2	99.9912
728	773	0	34227	0	0	0	12	0	1	0	0	0	0	0	0	0	1	34241	2	99.9942
730	770	0	0	0	32746	0	3	2	0	11	0	2	0	0	0	1471	0	34235	2	95.6594
731	769	0	28694	0	0	0	9	0	0	0	0	0	0	0	0	5531	0	34234	2	83.8435
732	768	0	31199	0	0	1	80	0	0	0	0	0	2858	0	3	9	89	34239	3	91.3578
733	767	0	3	0	20515	0	4	1	0	5	0	22	5	0	1	10813	2865	34234	3	59.9463
734	766	1	5214	0	12991	0	85	0	9	184	0	296	31	0	109	13409	1901	34230	4	53.4356
739	761	25882	0	0	0	1	0	3	0	0	5	0	292	4903	3153	0	0	34239	2	75.5951
740	760	31808	0	0	0	2385	0	13	0	0	6	0	21	0	0	0	0	34233	2	99.8832
742	759	0	31083	0	2	0	2959	0	3	0	1	10	86	0	0	18	75	34237	3	99.4363
743	758	0	0	0	26438	0	3	1	0	0	0	0	0	0	2	7798	0	34242	2	77.218
744	757	0	1	0	22160	0	9192	1	0	0	2	2829	0	0	55	1	0	34241	3	91.5657
745	754	0	21098	0	28	1	10004	0	14	0	1	2159	5	0	391	197	341	34239	4	90.9226
746	753	0	21	0	0	0	30866	0	2	0	0	3347	0	0	4	0	1	34241	2	90.2047
747	752	34215	0	0	0	2	0	1	0	0	2	0	0	0	25	0	0	34245	2	99.9182
787	824	1	1	1	29289	2875	5	91	0	1025	0	29	0	0	0	923	2	34242	6	93.9548
788	823	0	6240	0	22657	0	1818	1	0	1	0	0	0	0	0	3519	0	34236	3	89.7155
789	822	0	28834	0	0	0	5148	1	1	0	2	6	2	0	1	140	106	34241	2	99.2436
792	814	8	1	0	6505	5	5500	21128	3	640	425	10	0	0	1	10	0	34236	5	35.1063
793	813	14485	5	85	1	16729	0	0	0	0	7	23	6	14	15	0	2869	34239	5	91.4308
794	812	0	0	0	31320	0	8	5	1	2878	0	0	0	0	0	31	0	34243	2	91.4873
795	811	1	27969	0	29	0	218	0	12	0	0	2868	1	0	7	3076	61	34242	4	82.4046
796	810	0	439	588	3	2205	30852	0	22	0	95	37	0	0	1	0	0	34242	5	99.5473
797	809	23426	0	4	0	0	0	1	0	1	1	0	2878	7923	3	0	3	34240	2	68.4287
798	808	0	23226	1	1	0	85	0	8	5	4	2651	7506	1	244	81	423	34236	4	68.095
799	807	2	0	30967	0	3207	0	0	2	2	0	49	0	7	0	0	8	34244	3	99.8014
800	806	0	0	34114	0	30	0	0	1	4	0	2	0	82	0	0	9	34242	2	99.7138
Presented in table base pair (BP) counts are based on alignment of all unique vRNA8 sequences available in NCBI Influenza Virus Database. Base pairs in columns i-j correspond to secondary structure model of vRNA8 in cell lysate of A/California/04/2009 (Figure 2). Canonical pairs are presented to the left of the vertical line separating the UG and GA columns. The compensatory and consistent mutati…

## Sheet: Local vRNA8 base pair counts
Table S4. Base-pairing conservation (BP) calculation across type A influenza in vRNA8 local structure
i	j	GC	CG	AU	UA	GU	UG	GA	AG	AA	GG	UU	CC	AC	UC	CA	CU	Total Pairs	BP Types	% Canonical
13	28	137	0	15	0	7481	0	1	0	0	0	10	0	0	0	0	6	7650	3	99.7778
14	27	1834	0	5	0	16558	0	1	0	0	0	23	0	0	2	0	5	18428	3	99.8318
15	26	0	0	0	18440	0	5	129	1	7	0	9	0	0	2	4	0	18597	2	99.1827			Avg. % Canonical BP	86.448
16	25	16123	0	2	0	3005	0	11	0	0	0	6	2	31	28	1	0	19209	3	99.5887				% total
30	64	0	0	34076	0	133	0	0	3	1	0	13	0	10	0	0	12	34248	2	99.8861			GC pairs	34.9551
31	63	1	0	16074	0	0	0	0	1	2	0	3	2	18154	8	0	0	34245	2	46.9412			AU pairs	35.0816
32	62	0	0	1	0	0	31313	0	11	0	1	2910	0	0	12	0	0	34248	2	91.4331			GU pairs	16.2365
33	61	22	0	30999	0	366	0	0	4	17	0	10	2	2821	1	0	2	34244	3	91.6569			CA	5.81248
34	60	0	0	23429	0	4	0	0	36	2878	0	4	0	7880	0	0	9	34240	2	68.4375			GA	1.92987
35	59	33642	0	0	0	2	0	0	0	0	1	0	1	596	2	0	0	34244	2	98.2479			CU	2.07364
38	57	33876	0	0	0	338	0	17	0	0	1	1	4	2	7	0	0	34246	2	99.9066			AA	0.955397
39	56	1	0	34161	0	61	0	0	18	1	0	4	0	0	0	0	0	34246	3	99.9328			GG	2.36152
43	52	34222	0	0	0	15	0	0	0	0	3	0	1	6	1	0	0	34248	2	99.9679			CC	0.637124
44	51	2	0	28504	0	3	0	0	0	1	0	6	1	5720	1	0	4	34242	3	83.2574			UU	1.84064
45	50	7471	0	3203	0	23530	0	8	0	2	9	8	0	5	4	0	2	34242	3	99.889
71	124	0	34238	0	0	0	0	0	0	0	2	0	0	0	0	7	1	34248	1	99.9708
72	123	1	0	22230	5	44	0	114	64	10641	0	3	0	1106	0	12	5	34225	4	65.0986
73	121	0	0	34217	0	8	0	0	4	1	0	0	0	17	0	0	0	34247	2	99.9358
74	120	18545	0	6794	0	6637	0	13	3	1	1	0	2	2248	0	0	0	34244	3	93.3769
76	119	0	0	34224	0	6	0	0	0	0	0	1	0	11	0	0	4	34246	2	99.9533
77	118	378	0	10950	0	22628	0	0	10	1	15	0	0	256	0	0	3	34241	3	99.1677
78	117	0	130	0	20896	1	6509	311	81	10	2509	0	0	0	2	3795	0	34244	4	80.4112
79	116	0	0	34225	0	1	0	0	2	0	0	1	0	17	0	0	0	34246	2	99.9416
80	115	33996	0	0	0	0	0	0	0	0	3	0	5	210	29	0	0	34243	1	99.2787
81	114	0	191	0	14642	0	17008	2	2	35	10	0	0	0	1	2351	0	34242	3	92.9881
82	113	0	0	0	34241	0	2	1	0	1	0	0	0	0	0	2	0	34247	2	99.9883
87	109	2	0	783	2	20959	0	1	1	2	0	12446	0	0	0	0	48	34244	4	63.5031
88	108	6626	0	0	0	27592	0	4	0	1	3	0	0	0	0	0	1	34227	2	99.9737
89	107	0	34228	0	0	0	7	0	3	0	1	0	4	0	0	0	2	34245	2	99.9708
92	101	3	0	1	0	34235	0	0	0	0	2	2	0	0	0	0	5	34248	3	99.9737
93	100	1	33757	0	0	0	379	0	98	0	7	0	2	0	0	0	1	34245	3	99.6846
94	99	0	0	25065	0	1	0	0	308	1875	0	0	0	6993	1	0	0	34243	2	73.2004
125	263	0	0	0	34033	0	2	2	0	5	0	181	0	0	2	22	0	34247	2	99.381
126	262	0	9445	0	196	0	12524	41	9485	164	2360	0	0	0	0	20	0	34235	3	64.7437
127	261	17170	0	467	1	199	0	21	1	69	2	26	80	12896	3307	0	0	34239	4	52.0956
128	260	0	8651	0	15	0	25430	0	130	0	10	5	1	0	0	2	3	34247	3	99.5591
129	259	0	0	0	21671	0	1	2032	0	109	0	1	0	0	0	10415	0	34229	2	63.3147
130	258	0	2	2	24951	0	27	2889	0	17	2	5	0	1	4	6343	0	34243	4	72.9551
136	250	0	29130	1	0	0	2040	0	2909	5	7	3	27	0	0	57	63	34242	3	91.0315
137	249	0	67	0	6725	25	5856	2	0	0	1	21121	0	1	424	1	6	34229	4	37.0242
138	248	19849	1	114	4	154	3	338	6	416	340	1	17	12887	101	2	3	34236	6	58.7832
139	247	0	33	0	32149	0	1891	12	9	17	0	7	0	0	0	120	0	34238	3	99.5181
140	246	10517	0	58	4	20042	2	28	0	0	556	130	10	29	2858	0	2	34236	5	89.4468
143	192	7325	0	0	38	13767	700	9	0	0	21	12244	0	0	135	0	1	34240	4	63.7558
144	191	2541	21475	1	0	1	9755	0	63	0	14	3	6	355	2	0	23	34239	5	98.639
145	190	0	0	31307	0	21	0	0	0	3	0	0	20	8	0	0	2887	34246	2	91.4793
195	228	0	1335	0	7367	0	22918	17	190	6	9	82	0	0	3	2312	5	34244	3	92.3373
196	227	0	34054	0	0	0	3	0	0	0	0	0	0	0	0	187	2	34246	2	99.4481
197	226	4	0	0	2	30992	0	3	0	0	0	3237	0	0	3	0	2	34243	3	90.5236
198	225	0	31355	0	0	0	0	0	2	0	1	0	1	0	0	2879	1	34239	1	91.5769
200	223	0	0	9127	0	0	0	0	16990	8118	0	0	0	6	0	1	3	34245	1	26.6521
201	222	109	8659	1	2118	241	12950	75	30	14	541	9055	5	2	90	319	24	34233	6	70.3356
202	221	0	374	0	300	0	30615	8	9	0	2918	14	0	0	1	2	0	34241	3	91.3788
203	220	0	0	0	34114	0	8	15	0	4	0	4	0	0	1	99	0	34245	2	99.6408
204	219	2	10269	8	1139	57	18091	1	2842	23	108	868	2	0	56	76	678	34220	6	86.3998
206	218	0	33738	0	0	0	461	0	33	0	4	0	0	0	2	1	3	34242	2	99.8744
207	217	4	0	9973	0	24248	1	2	3	2	3	0	0	4	0	0	3	34243	4	99.9504
230	237	31484	0	109	1	448	0	17	3	3	5	1	0	2103	67	0	0	34241	4	93.5779
231	236	32857	0	1	0	111	0	0	1	0	1	1	5	1206	44	0	0	34227	3	96.3245
265	284	0	3	0	28623	0	2904	1	1	5	0	6	2	0	2696	6	0	34247	3	92.0665
266	283	0	31252	0	0	0	30	0	1	0	1	0	2894	0	6	16	41	34241	2	91.3583
267	282	0	0	0	33816	0	27	0	0	0	0	391	0	0	0	11	0	34245	2	98.8261
268	281	0	34186	0	0	0	39	0	7	0	0	0	0	0	0	9	1	34242	2	99.9504
269	280	0	0	0	34241	0	3	0	0	0	0	0	0	0	0	3	0	34247	2	99.9912
270	279	26071	0	0	0	8166	0	0	0	0	10	0	0	0	0	0	0	34247	2	99.9708
286	344	0	0	0	33058	0	3	3	0	2	0	1	0	0	0	1174	0	34241	2	96.5538
287	343	0	33750	0	0	0	485	0	0	0	1	0	1	0	0	3	2	34242	2	99.9796
288	342	23	0	1	0	33456	0	0	0	0	51	709	0	0	3	0	5	34248	3	97.7575
289	341	0	0	34244	0	2	0	0	0	1	0	0	0	0	0	0	1	34248	2	99.9942
290	340	0	0	34141	0	7	0	0	1	1	0	0	0	93	0	0	2	34245	2	99.7167
293	338	22	0	3	1	33912	0	169	0	0	88	48	1	0	0	0	0	34244	4	99.1064
294	337	0	0	0	31136	0	2	7	0	2901	0	1	0	0	1	199	0	34247	2	90.9218
295	336	33770	0	0	0	30	0	20	0	0	0	0	0	428	0	0	0	34248	2	98.6919
296	335	0	6	0	0	0	34239	0	0	0	2	0	0	0	1	0	0	34248	2	99.9912
312	327	27530	0	889	0	4107	0	54	3	0	4	0	0	1618	17	0	0	34222	3	95.0441
313	326	0	37	0	32525	0	101	125	0	2	1	10	1	0	3	1434	0	34239	3	95.3971
314	325	0	34086	0	0	0	21	0	0	0	0	0	1	0	0	34	103	34245	2	99.597
315	324	0	34217	0	0	0	5	0	0	0	0	0	1	0	0	9	13	34245	2	99.9328
316	323	0	0	0	29666	0	2	43	0	3012	0	1	0	0	0	1521	0	34245	2	86.6345
317	322	0	33586	0	0	0	644	0	0	0	0	0	0	0	0	16	0	34246	2	99.9533
345	360	0	34193	0	0	0	27	0	5	0	0	0	1	0	0	18	3	34247	2	99.9212
346	359	0	0	34234	0	0	0	0	5	1	0	0	0	5	0	1	0	34246	1	99.965
347	358	0	0	0	34169	0	73	0	0	2	0	1	0	0	1	1	0	34247	2	99.9854
349	356	0	33976	0	0	0	3	0	1	0	0	0	6	0	0	21	240	34247	2	99.2174
350	355	0	0	0	34238	0	1	3	0	0	0	1	0	0	2	3	0	34248	2	99.9737
361	497	0	2	0	33675	0	457	6	0	1	1	0	0	0	0	97	0	34239	3	99.6933
362	496	0	18490	0	1	0	6	0	0	0	0	9	250	0	0	5516	9966	34238	3	54.0248
364	494	0	0	0	34033	0	191	5	0	2	0	1	0	0	10	0	0	34242	2	99.9474
365	493	32452	0	0	0	527	0	1198	0	4	19	0	0	41	0	0	0	34241	2	96.3144
366	492	33798	0	2	0	379	0	0	0	0	1	2	3	45	6	0	1	34237	3	99.8306
367	491	0	0	31078	0	36	0	0	6	2	0	55	6	208	0	0	2847	34238	2	90.8756
368	490	0	0	6897	0	0	0	6	4745	14887	2	0	0	7693	0	0	0	34230	1	20.149
369	489	13	0	9109	0	22172	1	0	0	0	0	2925	0	2	1	0	12	34235	4	91.4123
370	488	6	0	32224	0	1952	0	0	2	0	0	4	0	54	0	0	0	34242	3	99.8248
371	487	17691	0	37	1	16222	0	2	0	0	11	201	0	36	36	0	1	34238	4	99.1618
372	486	0	0	33281	0	5	0	0	16	7	0	0	0	931	0	0	0	34240	2	97.2138
374	403	1506	0	195	0	29671	0	1120	1	4	1665	75	0	1	1	0	1	34240	3	91.6238
375	402	33331	0	2	0	533	0	225	0	46	1	0	1	85	17	1	0	34242	3	98.9019
376	401	0	14602	2	91	0	16521	0	2924	11	31	19	2	0	1	32	1	34237	4	91.1762
377	400	0	0	30785	0	32	0	0	2333	925	0	0	0	171	0	0	0	34246	2	89.9872
378	399	9	0	29819	0	1086	0	1	3	2	0	2894	0	362	3	0	65	34244	3	90.2757
379	398	0	0	0	28661	0	12	2765	0	249	0	0	0	0	0	2554	0	34241	2	83.7388
380	397	3	0	14	37	7429	33	20662	0	10	5878	157	0	0	0	0	0	34223	5	21.9618
381	396	33985	0	1	0	217	0	4	0	0	0	0	1	24	10	0	0	34242	3	99.8861
382	395	0	0	0	31275	1	45	19	0	2899	0	2	0	0	1	3	0	34245	3	91.4615
383	392	31190	3	0	0	1	132	0	2	0	2775	0	0	139	3	0	0	34245	4	91.4761
384	391	0	0	14299	2	1	4	0	15710	3956	0	12	0	254	1	0	0	34239	4	41.7828
414	476	0	0	0	34218	0	2	4	0	9	0	0	0	0	1	8	0	34242	2	99.9358
415	475	23412	0	333	0	5169	0	937	26	22	2184	0	0	2141	7	0	0	34231	3	84.4673
416	474	1	0	31804	0	4	0	0	1	0	0	5	0	2427	0	0	0	34242	3	92.8947
418	472	87	0	29291	0	659	0	0	1	1	0	835	5	3244	21	0	94	34238	3	87.73
419	471	34224	0	0	0	0	0	6	0	0	0	0	7	1	2	0	0	34240	1	99.9533
420	470	0	34229	0	0	0	3	0	2	0	1	0	5	0	0	1	0	34241	2	99.9737
422	466	0	18917	0	10	0	18	2	0	0	1	0	3	0	0	15269	3	34223	3	55.3575
423	464	0	0	0	34202	0	5	31	0	0	0	0	0	0	0	2	0	34240	2	99.9036
424	463	0	3739	2	142	1	17905	108	7038	400	4775	1	0	0	0	126	0	34237	5	63.6417
425	462	0	0	31317	0	3	0	0	4	2906	0	1	0	9	0	0	1	34241	2	91.4693
426	461	25143	4	28	0	5351	0	1	46	0	2858	7	3	758	35	0	0	34234	4	89.1687
427	460	5	32	551	30200	73	171	585	3	132	8	2	2	102	3	2369	0	34238	6	90.6361
429	459	21455	0	63	0	76	0	22	0	3	3	0	3	12602	10	0	0	34237	3	63.0721
430	458	0	1	0	30734	0	54	2967	0	162	3	6	0	0	0	312	0	34239	3	89.9238
436	457	13589	46	839	309	6084	2363	71	3	64	17	396	35	6169	4091	139	10	34225	6	67.8744
437	456	617	0	22	0	29423	1	164	0	0	2786	1194	0	0	11	3	17	34238	4	87.8059
438	455	0	8	0	31570	0	427	2	0	52	0	14	0	0	13	2147	0	34233	3	93.4917
439	454	1	12879	2	6373	0	797	316	11	25	1	2071	106	1	85	10604	954	34226	5	58.587
440	453	0	0	0	34143	0	68	3	0	1	0	2	0	0	3	20	0	34240	2	99.9153
442	451	0	4635	0	16084	0	3467	5	665	102	3	0	3	0	1	9242	5	34212	3	70.6945
443	450	2	0	12149	0	1	0	0	5	3	0	0	1	22073	0	0	1	34235	3	35.4958
500	547	31971	0	0	1	596	0	1587	0	0	20	0	3	33	2	0	0	34213	3	95.1919
501	546	0	34156	0	0	0	43	0	34	0	0	0	2	0	0	4	0	34239	2	99.8832
502	545	0	30460	0	0	0	3743	0	24	0	1	0	0	0	0	2	3	34233	2	99.9124
503	544	0	5	0	9976	1	21241	0	1	0	1	2930	0	0	78	4	1	34238	4	91.194
504	543	8	0	0	0	34222	0	0	0	0	6	4	0	0	0	0	0	34240	2	99.9708
505	542	9457	0	905	0	21342	0	32	0	4	187	3	0	2298	1	0	2	34231	3	92.6178
517	541	18505	0	1325	0	3849	0	24	0	22	8	4	2581	7597	99	0	210	34224	3	69.1883
518	540	0	30953	0	0	0	152	0	2991	0	1	0	1	1	22	86	29	34236	2	90.8547
519	539	81	0	30957	0	183	0	1	0	14	0	2941	0	42	0	0	19	34238	3	91.1882
522	538	19050	0	173	0	14802	0	21	0	0	27	11	0	138	6	0	0	34228	3	99.4069
523	537	6	0	20419	0	13546	0	0	17	0	0	216	0	12	0	0	19	34235	3	99.2289
524	536	73	0	17	0	31227	0	3	0	0	8	21	4	0	0	0	2887	34240	3	91.4632
525	535	8716	1	11739	0	9868	0	2	1	1	1	14	328	935	183	0	2450	34239	4	88.5657
526	534	5189	0	547	42	8891	2	6	3	159	4	1095	1515	6436	7705	207	2413	34214	5	42.8801
549	592	0	5	0	32389	2	1541	15	0	28	0	182	0	0	16	64	0	34242	4	99.1093
550	591	21589	0	1	0	8	0	0	0	0	0	1	832	3248	8564	0	0	34243	3	63.0727
551	590	0	0	34205	0	2	0	0	0	1	0	0	0	34	0	0	0	34242	2	99.8978
553	589	0	29674	0	0	1	48	0	10	0	2	0	4	0	0	3780	718	34237	3	86.8154
554	588	0	0	34199	0	10	0	0	18	8	0	0	0	0	0	0	9	34244	2	99.8978
555	587	0	0	0	34188	0	2	40	0	7	0	0	0	0	0	7	0	34244	2	99.8423
556	586	31003	0	0	0	178	0	2	0	0	0	1	77	905	2073	0	0	34239	2	91.0687
558	585	0	0	33920	0	88	0	0	3	119	0	7	0	32	0	0	74	34243	2	99.3137
559	584	0	31255	0	0	0	0	0	8	0	3	0	2903	1	0	6	66	34242	1	91.2768
560	583	0	12073	0	0	0	2	0	8	5	0	0	8	0	0	22043	103	34242	2	35.2637
564	582	0	21892	0	0	2	123	0	3	0	14	7623	779	0	43	22	3739	34240	3	64.302
565	581	0	166	0	24178	0	340	2	0	3	0	5	1	0	3	9535	0	34233	3	72.1059
566	580	0	10973	0	60	0	43	0	1	2	0	142	102	0	3	19912	2996	34234	3	32.3538
567	579	9608	0	0	0	16	0	1	0	0	0	10	8	0	24599	0	1	34243	2	28.105
569	576	31335	0	0	0	22	0	0	0	0	0	0	2875	5	6	0	1	34244	2	91.5693
570	575	0	0	31137	0	11	0	0	0	0	0	3078	0	2	1	0	13	34242	2	90.9643
600	697	2	0	27124	0	8	0	1	1077	1416	1	0	0	4591	0	0	0	34220	3	79.2928
601	696	18030	0	0	16	9	0	55	0	12	2	1	3652	3759	8694	0	2	34232	3	52.743
602	695	0	33922	0	0	0	290	0	18	0	0	0	4	0	0	3	1	34238	2	99.9241
603	644	8615	0	206	0	25248	0	48	0	0	10	68	2	23	18	0	1	34239	3	99.5035
604	643	1	8553	0	8866	0	4241	269	127	2786	46	35	3	0	93	9148	37	34205	4	63.327
605	642	33493	0	2	0	638	0	3	0	0	2	0	0	89	12	0	0	34239	3	99.6904
606	641	18	0	28526	0	5466	0	0	4	8	2	20	0	125	1	0	67	34237	3	99.337
611	640	26089	0	11	0	5940	0	1101	0	13	41	8	2	1009	16	0	0	34230	3	93.6021
612	639	21685	0	34	0	12228	0	162	0	0	20	27	0	80	4	0	0	34240	3	99.1443
613	638	12	8020	884	57	1963	20183	19	612	27	105	49	4	6	0	11	36	31988	6	97.2834
614	637	41	898	19315	45	9364	4	8	24	78	5	8	5	219	0	1902	78	31994	6	92.7268
615	636	0	18140	0	372	0	11337	0	24	1	29	14	1	0	1	2005	50	31974	3	93.354
616	633	3	0	15566	0	6953	4	0	7	0	4	9358	0	18	3	0	67	31983	4	70.4312
617	632	6052	0	7	0	25865	2	5	0	0	37	15	0	0	0	0	2	31985	4	99.8155
618	630	1	0	31793	0	30	0	0	68	6	0	12	0	72	1	0	2	31985	3	99.4966
619	629	8	0	7	10788	2	32	14066	72	6896	6	8	0	1	7	91	0	31984	5	33.8826
620	628	21770	0	7	0	1249	0	2105	0	14	26	0	1	6803	13	1	0	31989	3	71.981
621	626	2	30532	1	0	0	61	0	2	0	19	3	777	2	0	68	499	31966	4	95.7142
645	666	0	8995	17	8963	0	94	1	13	2	1	376	2849	0	41	139	12745	34236	4	52.7778
646	665	15731	0	8296	1	121	0	16	0	1	3	1218	39	4632	2506	0	1668	34232	4	70.5451
647	664	28951	0	7	552	1705	41	173	29	0	2611	29	3	55	16	36	6	34214	5	91.3544
648	663	5	0	30370	0	864	1	0	4	2	0	2886	0	84	10	0	13	34239	4	91.241
649	662	0	11	0	29042	0	8	49	0	9	0	0	0	0	0	5117	0	34236	3	84.8843
650	661	0	7	0	27692	0	5922	1	1	1	0	63	0	0	207	341	0	34235	3	98.2065
670	694	0	13767	7	886	2	8404	7	3000	1206	24	46	19	0	0	5687	1162	34217	5	67.4109
671	693	0	0	34216	0	6	0	0	2	3	0	0	0	12	0	0	4	34243	2	99.9387
672	692	0	33140	0	0	0	1064	0	13	0	8	0	0	0	0	16	3	34244	2	99.8832
675	689	27	1	0	11688	2	29	7	0	8	0	8479	10	60	13727	201	6	34245	5	34.3028
677	688	1	175	3	28858	0	1393	0	108	298	1	349	68	0	2869	107	2	34232	5	88.8934
678	687	30665	0	0	4	341	0	178	0	0	2	6	3	6	3031	0	0	34236	3	90.5772
679	686	0	9682	1	8629	1	1969	1	2	2	3	2883	6	0	14	8903	2143	34239	5	59.2365
680	685	0	2	1	22582	1	286	1	0	2	0	5840	325	3	5121	48	25	34237	5	66.8049
698	713	30977	0	4	0	235	0	5	0	0	2	0	15	2930	71	0	0	34239	3	91.1709
699	712	5	254	0	13793	0	8570	479	9	2249	54	23	689	5	11	5884	2218	34243	4	66.0631
700	711	0	2404	0	352	0	30905	0	64	0	42	124	3	0	3	7	338	34242	3	98.3033
701	710	0	0	0	29179	0	5	2	0	8	0	5	0	0	0	5038	1	34238	2	85.2386
702	709	13	6064	0	82	7	3267	1	0	0	2170	7825	11807	0	2092	305	604	34237	5	27.5521
703	708	28355	0	40	1	1621	0	5	0	0	2	25	2203	1201	770	2	11	34236	4	87.6767
717	784	31535	0	0	2	1958	0	654	0	0	3	3	0	6	76	0	0	34237	3	97.8328
718	783	8994	0	7670	2876	49	0	0	0	12	0	17	4	14551	68	1	0	34242	4	57.2075
719	782	34147	0	0	0	37	0	8	0	0	3	0	3	3	39	0	0	34240	2	99.8364
720	781	0	2	0	32572	0	1524	1	0	8	0	38	0	0	41	55	0	34241	3	99.5824
721	780	27494	0	0	0	0	0	0	0	0	0	0	8	6713	27	0	0	34242	1	80.2932
723	778	0	0	0	34039	0	107	4	0	63	0	0	0	0	1	28	0	34242	2	99.7196
724	777	33227	0	0	0	360	0	9	0	0	1	3	5	500	136	0	0	34241	2	98.09
725	776	0	34197	0	0	0	3	0	0	0	3	0	1	0	0	28	11	34243	2	99.8744
726	775	0	28723	0	367	0	2206	0	10	20	0	6	1	0	1	2879	25	34238	3	91.4072
727	774	0	1278	0	0	0	32959	0	1	0	1	1	0	0	0	0	0	34240	2	99.9912
728	773	0	34227	0	0	0	12	0	1	0	0	0	0	0	0	0	1	34241	2	99.9942
730	770	0	0	0	32746	0	3	2	0	11	0	2	0	0	0	1471	0	34235	2	95.6594
731	769	0	28694	0	0	0	9	0	0	0	0	0	0	0	0	5531	0	34234	2	83.8435
732	768	0	31199	0	0	1	80	0	0	0	0	0	2858	0	3	9	89	34239	3	91.3578
733	767	0	3	0	20515	0	4	1	0	5	0	22	5	0	1	10813	2865	34234	3	59.9463
734	766	1	5214	0	12991	0	85	0	9	184	0	296	31	0	109	13409	1901	34230	4	53.4356
739	761	25882	0	0	0	1	0	3	0	0	5	0	292	4903	3153	0	0	34239	2	75.5951
740	760	31808	0	0	0	2385	0	13	0	0	6	0	21	0	0	0	0	34233	2	99.8832
742	759	0	31083	0	2	0	2959	0	3	0	1	10	86	0	0	18	75	34237	3	99.4363
743	758	0	0	0	26438	0	3	1	0	0	0	0	0	0	2	7798	0	34242	2	77.218
744	757	0	1	0	22160	0	9192	1	0	0	2	2829	0	0	55	1	0	34241	3	91.5657
745	754	0	21098	0	28	1	10004	0	14	0	1	2159	5	0	391	197	341	34239	4	90.9226
746	753	0	21	0	0	0	30866	0	2	0	0	3347	0	0	4	0	1	34241	2	90.2047
747	752	34215	0	0	0	2	0	1	0	0	2	0	0	0	25	0	0	34245	2	99.9182
787	824	1	1	1	29289	2875	5	91	0	1025	0	29	0	0	0	923	2	34242	6	93.9548
788	823	0	6240	0	22657	0	1818	1	0	1	0	0	0	0	0	3519	0	34236	3	89.7155
789	822	0	28834	0	0	0	5148	1	1	0	2	6	2	0	1	140	106	34241	2	99.2436
792	814	8	1	0	6505	5	5500	21128	3	640	425	10	0	0	1	10	0	34236	5	35.1063
793	813	14485	5	85	1	16729	0	0	0	0	7	23	6	14	15	0	2869	34239	5	91.4308
794	812	0	0	0	31320	0	8	5	1	2878	0	0	0	0	0	31	0	34243	2	91.4873
795	811	1	27969	0	29	0	218	0	12	0	0	2868	1	0	7	3076	61	34242	4	82.4046
796	810	0	439	588	3	2205	30852	0	22	0	95	37	0	0	1	0	0	34242	5	99.5473
797	809	23426	0	4	0	0	0	1	0	1	1	0	2878	7923	3	0	3	34240	2	68.4287
798	808	0	23226	1	1	0	85	0	8	5	4	2651	7506	1	244	81	423	34236	4	68.095
799	807	2	0	30967	0	3207	0	0	2	2	0	49	0	7	0	0	8	34244	3	99.8014
800	806	0	0	34114	0	30	0	0	1	4	0	2	0	82	0	0	9	34242	2	99.7138
836	877	0	0	0	16464	0	17	0	0	0	0	18	0	0	52	1	0	16552	2	99.571
837	876	16672	0	0	0	7	0	42	0	0	11	0	0	0	6	0	0	16738	2	99.6475
838	875	38	0	12488	0	6039	0	0	5	28	1	1	0	484	0	0	0	19084	3	97.2804
845	870	7612	0	125	0	11894	0	1108	0	0	27	0	0	22	1	0	0	20789	3	94.4297
846	869	0	0	18798	1	4	0	0	4	0	0	2377	0	7	0	0	6	21197	3	88.7059
847	868	0	18637	0	0	0	2679	0	17	0	1	0	2	0	0	1	11	21348	2	99.8501
848	867	0	0	21672	0	68	0	0	9	6	0	4	0	2	0	0	4	21765	2	99.8851
849	866	0	28	0	6383	0	9	1	0	55	0	0	0	0	0	15480	7	21963	3	29.231
850	865	12	1	15496	0	3885	17	3	1	4	0	183	3	51	0	30	2404	22090	5	87.8723
851	864	0	0	6	0	34235	0	0	0	0	0	3	0	0	0	0	3	34247	2	99.9825
852	863	0	0	0	34232	0	0	10	0	3	0	0	0	0	0	3	0	34248	1	99.9533
853	862	30129	0	0	0	0	0	0	0	0	0	0	2	4071	23	0	0	34225	1	88.0321
Presented in table base pair (BP) counts are based on alignment of all unique vRNA8 sequences available in NCBI Influenza Virus Database. Base pairs in columns i-j correspond to secondary structure model of vRNA8 in cell lysate of A/California/04/2009 (Figure 2). Canonical pairs are presented to the left of the vertical line separating the UG and GA columns. The compensatory and consistent mutati…
